# Supplementary material for: Enhanced carboxylation of furoic salt with CO2 by ZnCl2 coordination for efficient production of 2,5-furandicarboxylic acid
Source: Royal Society of Chemistry journal article supplement (doi:10.1039/d4dt01196a), 2024-01-01
Supplement: d4dt01196a1.pdf [file d4dt01196a1.pdf]

## *Supporting information*

### Enhanced Carboxylation of Furoic Salt with CO<sub>2</sub> by ZnCl<sub>2</sub> Coordination for Efficient Production of 2,5-Furandicarboxylic Acid

Peiyao Liu <sup>a</sup>, Zhengzeng Yang <sup>a</sup>, Mengyuan Zhang <sup>a</sup>, Yufeng Liu <sup>d</sup>, Dandan Han <sup>c</sup>, Dan Wu <sup>a\*</sup>,

Chunbao Xu <sup>b</sup> and Jianshe Wang <sup>a\*</sup>

<sup>a</sup> School of Chemical Engineering, Zhengzhou University, Zhengzhou, 450001, People's Republic of China. E-mail: [wudan@zzu.edu.cn](mailto:wudan@zzu.edu.cn); [wangjs07@zzu.edu.cn](mailto:wangjs07@zzu.edu.cn).

<sup>b</sup> School of Energy and Environment, City University of Hong Kong, Hong Kong SAR, China.

<sup>c</sup> College of Sciences, Henan Agricultural University, Zhengzhou, 450002, China.

<sup>d</sup> College of Computer Science and Technology, Taiyuan University of Technology, Taiyuan, 030024, China.

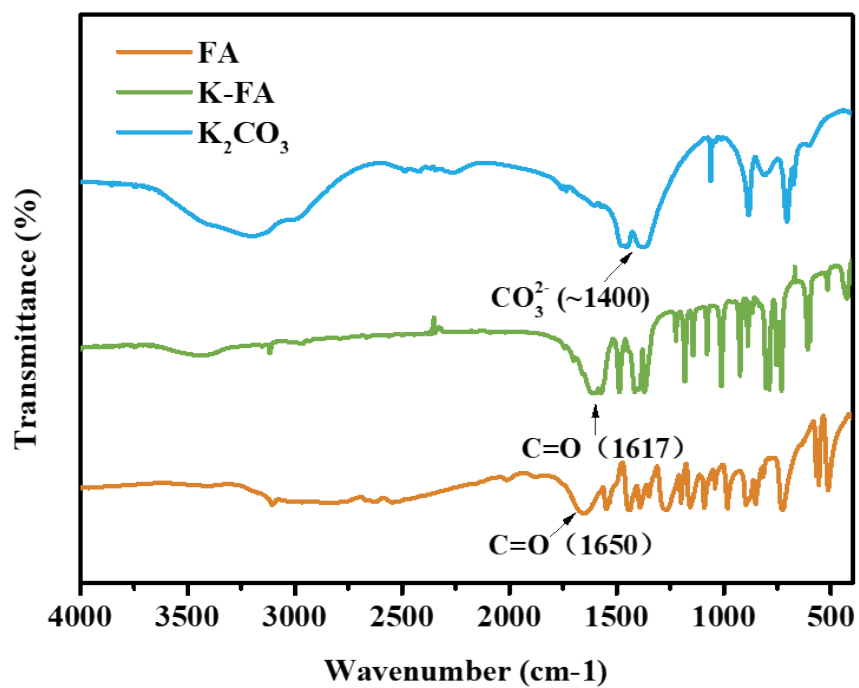

Figure S1. *Infrared spectra of FA, K<sub>2</sub>CO<sub>3</sub> and K-FA*

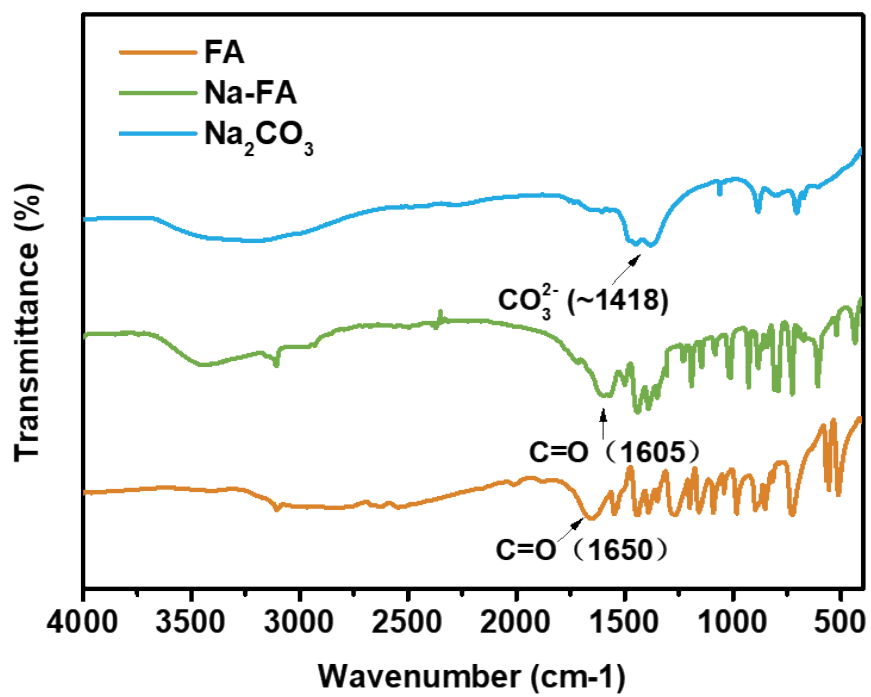

Figure S2. Infrared spectra of FA, Na<sub>2</sub>CO<sub>3</sub> and Na-FA.

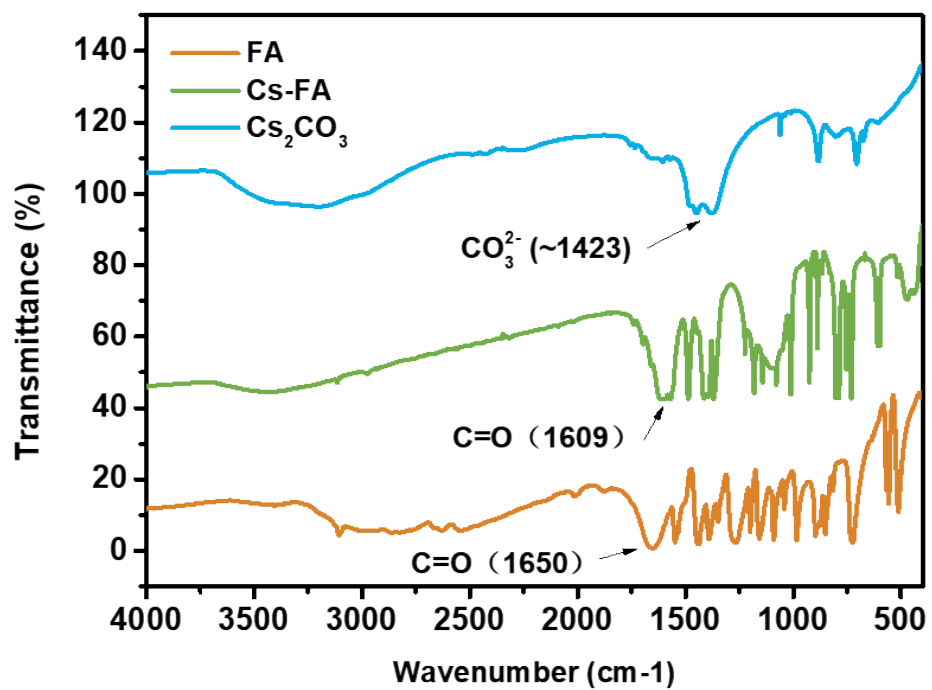

Figure S3. Infrared spectra of FA,  $\text{Cs}_2\text{CO}_3$  and Cs-FA.

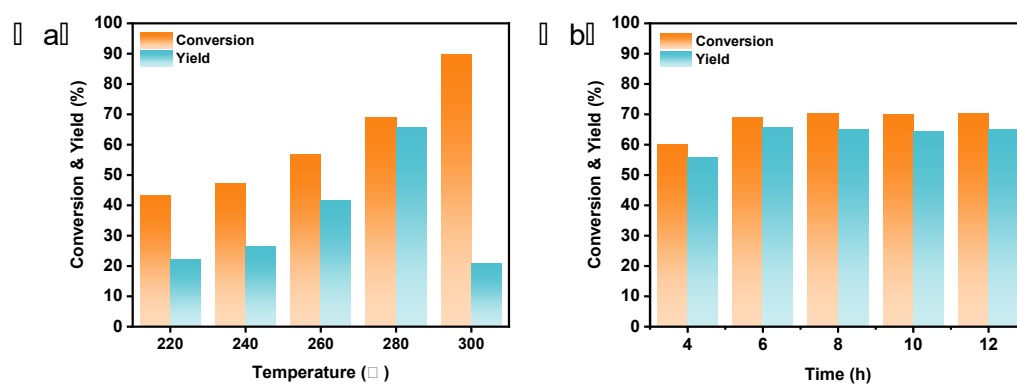

Figure S4. Effect of FeCl<sub>3</sub> on CO<sub>2</sub> carboxylation in K-FA/Cs<sub>2</sub>CO<sub>3</sub> reaction system. (a) Reaction temperature; (b) Reaction time. Reaction conditions: 1 mmol K-FA, 1 mmol Cs<sub>2</sub>CO<sub>3</sub>, 220 ~ 300°C, 1 MPa CO<sub>2</sub>, 4 ~ 12 h.

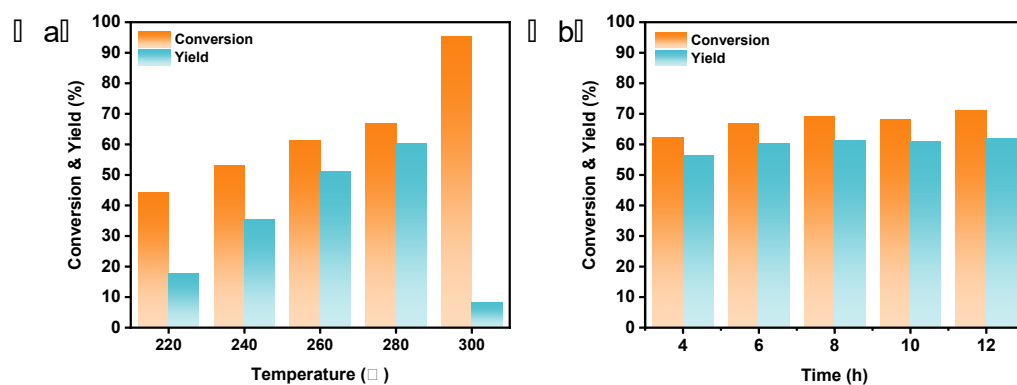

Figure S5. Effect of  $\text{CuCl}_2$  on  $\text{CO}_2$  carboxylation in  $\text{K-FA}/\text{Cs}_2\text{CO}_3$  reaction system. (a) Reaction temperature; (b) Reaction time. Reaction conditions: 1 mmol  $\text{K-FA}$ , 1 mmol  $\text{Cs}_2\text{CO}_3$ , 220 ~ 300°C, 1 MPa  $\text{CO}_2$ , 4 ~ 12 h.
